# Supplementary material for: Association Between the EAT-Lancet Diet Pattern and Risk of Type 2 Diabetes: A Prospective Cohort Study
Source: PubMed Central journal article supplement (PMC8795697; doi:10.3389/fnut.2021.784018), 2022-01-14
Supplement: Data_Sheet_1.pdf [file Data_Sheet_1.pdf]

**Supplementary Table 1: Distribution of EAT-LDP score.**

| <b>Component</b>                                                          | <b>Criteria for minimum score of 0</b> | <b>Criteria for maximum score of 1*</b>              |
|---------------------------------------------------------------------------|----------------------------------------|------------------------------------------------------|
| <b><i>Whole grains and refined grains</i></b>                             |                                        |                                                      |
| 1 Rice, wheat, corn, and other                                            | >464 g/day                             | ≤ 464 g/day                                          |
| <b><i>Tubers and starchy vegetables</i></b>                               |                                        |                                                      |
| 2 Potatoes                                                                | >100 g/day                             | ≤100 g/day                                           |
| <b><i>Vegetables</i></b>                                                  |                                        |                                                      |
| 3 All vegetables                                                          | <200 g/day                             | ≥200 g/day                                           |
| <b><i>Fruits</i></b>                                                      |                                        |                                                      |
| 4 All fruits                                                              | <100 g/day                             | ≥100 g/day                                           |
| <b><i>Dairy foods</i></b>                                                 |                                        |                                                      |
| 5 Whole milk or derivative equivalents                                    | >500g/day                              | ≤500 g/day                                           |
| <b><i>Protein sources</i></b>                                             |                                        |                                                      |
| 6 Beef, lamb, pork                                                        | >28 g/day                              | ≤28 g/day                                            |
| 7 Chicken, other poultry                                                  | >58 g/day                              | ≤58 g/day                                            |
| 8 Eggs                                                                    | >25 g/day                              | ≤25 g/day                                            |
| 9 Fish                                                                    | >100g/day                              | ≤100g/day                                            |
| <b><i>Legumes</i></b>                                                     |                                        |                                                      |
| 10 Dry beans, lentils, peas                                               | >100 g/day                             | ≤100g/day                                            |
| 11 Soy foods                                                              | >50 g/day                              | ≤50g/day                                             |
| 12 Peanuts or tree nuts                                                   | <25 g/day                              | ≥25g/day                                             |
| <b><i>Added fats</i></b>                                                  |                                        |                                                      |
| 13 Palm oil, unsaturated oils, dairy fats (incl. in milk), lard or tallow |                                        | Ratio of 0.8 for unsaturated: saturated fat intake** |
| <b><i>Added sugars</i></b>                                                |                                        |                                                      |
| 14 All sweeteners                                                         | > 31g/day                              | ≤ 31g/day                                            |

\*Each food component contributed 1 point if participants met the recommendation of the EAT-Lancet diet pattern.

\*\*Too little information about the types of oils were recorded in the 24-hour diet recall so fat intake was approximated as a ratio of total unsaturated and saturated fat in line with the EAT-Lancet reference diet [Reference 20].

†Derived from sweet foods and beverages, and sugar added to food or beverages recorded in the 24-hour diet recall.

**Supplementary Table 2: Definition of portion size and food items used in this study.**

| <b>Component</b>                                                          | <b>Definition of 1 portion</b> | <b>Food items based on the Oxford WebQ questionnaire (24-hour dietary assessment tool)</b>                                                                                                                                                                                                                                                                 |
|---------------------------------------------------------------------------|--------------------------------|------------------------------------------------------------------------------------------------------------------------------------------------------------------------------------------------------------------------------------------------------------------------------------------------------------------------------------------------------------|
| <i><b>Whole grains and refined grains</b></i>                             |                                |                                                                                                                                                                                                                                                                                                                                                            |
| 1 Rice, wheat, corn, and other                                            | 1 portion: 130 g               | porridge, muesli, oat crunch, sweetened cereal, plain cereal, bran cereal, whole-wheat cereal, other cereal, white pasta, wholemeal pasta, white rice, brown rice, sushi, snackpot, couscous, other grain                                                                                                                                                  |
| <i><b>Tubers and starchy vegetables</b></i>                               |                                |                                                                                                                                                                                                                                                                                                                                                            |
| 2 Potatoes                                                                | 1 portion: 58 g                | Fried, boiled, baked or mashed potatoes, sweet potato                                                                                                                                                                                                                                                                                                      |
| <i><b>Vegetables</b></i>                                                  |                                |                                                                                                                                                                                                                                                                                                                                                            |
| 3 All vegetables                                                          | 1 portion: 100 g               | quorn, mixed vegetable, vegetable pieces, coleslaw, side salad, avocado, broad bean, green bean, beetroot, broccoli, butternut squash, cabbage, carrot, cauliflower, celery, courgette, cucumber, garlic, leek, lettuce, mushroom, onion, parsnip, pea, sweet pepper, spinach, fresh tomato, tinned tomato, turnip, watercress, other vegetable, sweetcorn |
| <i><b>Fruits</b></i>                                                      |                                |                                                                                                                                                                                                                                                                                                                                                            |
| 4 All fruits                                                              | 1 portion: 150 g               | stewed fruit, prune (1 portion: 48g), dried fruit (1 portion: 48g), mixed fruit, apple, banana, berry (1 portion: 48g), cherry (1 portion: 48g), grapefruit, grape (1 portion: 48g), mango, melon, orange, satsuma, peach, pear, pineapple, plum (1 portion: 48g), other fruit                                                                             |
| <i><b>Dairy foods</b></i>                                                 |                                |                                                                                                                                                                                                                                                                                                                                                            |
| 5 Whole milk or derivative equivalents                                    | 1 portion: 258 g               | milk, flavoured milk, yogurt (1 portion: 180g), low fat hard cheese, hard cheese, soft cheese, blue cheese, low fat cheese spread, cheese spread, cottage cheese, feta, mozzarella, goat's cheese, other cheese (1 portion: 28g)                                                                                                                           |
| <i><b>Protein sources</b></i>                                             |                                |                                                                                                                                                                                                                                                                                                                                                            |
| 6 Beef, lamb, pork                                                        |                                | bacon, ham (1 portion: 40g), liver, sausage, beef, pork, lamb (1 portion: 80g)                                                                                                                                                                                                                                                                             |
| 7 Chicken, other poultry                                                  | 1 portion: 80 g                | crumbed or deep-fried poultry, poultry                                                                                                                                                                                                                                                                                                                     |
| 8 Eggs                                                                    | 1 portion: 60 g                | whole egg, omelette, eggs in sandwich, scotch egg, other egg                                                                                                                                                                                                                                                                                               |
| 9 Fish                                                                    | 1 portion: 100 g               | shellfish, tinned tuna, oily fish, breaded fish, battered fish, white fish, other fish                                                                                                                                                                                                                                                                     |
| <i><b>Legumes</b></i>                                                     |                                |                                                                                                                                                                                                                                                                                                                                                            |
| 10 Dry beans, lentils, peas                                               | 1 portion: 100 g               | dried lentils, peas and baked beans                                                                                                                                                                                                                                                                                                                        |
| 11 Soy foods                                                              | 1 portion: 100 g               | tofu                                                                                                                                                                                                                                                                                                                                                       |
| 12 Peanuts or tree nuts                                                   | 1 portion: 28 g                | unsalted peanuts, salted nuts, unsalted nuts, seed                                                                                                                                                                                                                                                                                                         |
| <i><b>Added fats</b></i>                                                  |                                |                                                                                                                                                                                                                                                                                                                                                            |
| 13 Palm oil, unsaturated oils, dairy fats (incl. in milk), lard or tallow |                                | Ratio of 0.8 for unsaturated: saturated fat intake*                                                                                                                                                                                                                                                                                                        |

|                     |  |                                                                                                                  |
|---------------------|--|------------------------------------------------------------------------------------------------------------------|
| <i>Added sugars</i> |  |                                                                                                                  |
| 14 All sweeteners†  |  | derived from sweet foods and beverages, and sugar added to food or beverages recorded in the 24-hour diet recall |

\*Too little information about the types of oils were recorded in the 24-hour diet recall so fat intake was approximated as a ratio of total unsaturated and saturated fat in line with the EAT-Lancet reference diet [Reference 20].

†Derived from sweet foods and beverages, and sugar added to food or beverages recorded in the 24-hour diet recall.

**Supplementary Table 3: Numbers and proportions of the participants adhering to the recommended food intake by EAT-LDP score.**

| Component                                                                    | Total numbers<br>of participants,<br>n(%)* | Tertiles of EAT-LDP score |               |               | P value |
|------------------------------------------------------------------------------|--------------------------------------------|---------------------------|---------------|---------------|---------|
|                                                                              |                                            | T1                        | T2            | T3            |         |
| <b>Total, n(%)</b>                                                           | 59849                                      | 27527 (45.99)             | 15188 (25.38) | 17137 (28.63) |         |
| <b>Whole grains and refined grains, n(%)</b>                                 |                                            |                           |               |               |         |
| 1 Rice, wheat, corn, and other                                               | 45100 (75.36)                              | 17300 (62.85)             | 12301 (80.99) | 15523 (90.58) | <0.001  |
| <b>Tubers and starchy vegetables, n(%)</b>                                   |                                            |                           |               |               |         |
| 2 Potatoes                                                                   | 27208 (45.46)                              | 7276 (26.43)              | 7577 (49.89)  | 12355 (72.10) | <0.001  |
| <b>Vegetables, n(%)</b>                                                      |                                            |                           |               |               |         |
| 3 All vegetables                                                             | 34637 (57.87)                              | 9582 (34.81)              | 10422 (68.62) | 14633 (85.39) | <0.001  |
| <b>Fruits, n(%)</b>                                                          |                                            |                           |               |               |         |
| 4 All fruits                                                                 | 45274 (75.65)                              | 16610 (60.34)             | 12669 (83.41) | 15995 (93.34) | <0.001  |
| <b>Dairy foods, n(%)</b>                                                     |                                            |                           |               |               |         |
| 5 Whole milk or derivative equivalents                                       | 36943 (61.73)                              | 13006 (47.25)             | 10191 (67.10) | 13746 (80.21) | <0.001  |
| <b>Protein sources, n(%)</b>                                                 |                                            |                           |               |               |         |
| 6 Beef, lamb, pork                                                           | 1010 (1.69)                                | 170 (0.62)                | 236 (1.55)    | 604 (3.52)    | <0.001  |
| 7 Chicken, other poultry                                                     | 2694 (4.50)                                | 655 (2.38)                | 679 (4.47)    | 1360 (7.94)   | <0.001  |
| 8 Eggs                                                                       | 47632 (79.59)                              | 15985 (58.07)             | 12903 (84.96) | 15744 (91.87) | <0.001  |
| 9 Fish                                                                       | 14574 (24.35)                              | 3149 (11.44)              | 3665 (24.13)  | 7760 (45.28)  | <0.001  |
| <b>Legumes</b>                                                               |                                            |                           |               |               |         |
| 10 Dry beans, lentils, peas                                                  | 7798 (13.03)                               | 1758 (6.39)               | 1960 (12.90)  | 4080 (23.81)  | <0.001  |
| 11 Soy foods                                                                 | 59511 (99.46)                              | 27415 (99.59)             | 15101 (99.43) | 16995 (99.17) | <0.001  |
| 12 Peanuts or tree nuts                                                      | 3940 (6.58)                                | 585 (2.13)                | 788 (5.19)    | 2567 (14.98)  | <0.001  |
| <b>Added fats, n(%)</b>                                                      |                                            |                           |               |               |         |
| 13 Palm oil, unsaturated oils, dairy fats (included in milk), lard or tallow | 10622 (17.75)                              | 2119 (7.70)               | 2367 (15.58)  | 6136 (35.81)  | <0.001  |
| <b>Added sugars, n(%)</b>                                                    |                                            |                           |               |               |         |
| 14 All sweeteners                                                            | 914 (1.53)                                 | 597 (2.17)                | 179 (1.18)    | 138 (0.81)    | <0.001  |

\*The figures in the table mainly indicate the number of participants who reached the recommended food intake. Numbers in parentheses represent% that reached the recommendation within each tertile.

**Supplementary Table 4: Average intake of the food components according to EAT-LDP score.**

| Component                                                                    | Total intake<br>(g/day),<br>mean (SD)* | Tertiles of EAT-LDP score |                      |                      |
|------------------------------------------------------------------------------|----------------------------------------|---------------------------|----------------------|----------------------|
|                                                                              |                                        | T1                        | T2                   | T3                   |
| <b>Whole grains and refined grains, n(%)</b>                                 |                                        |                           |                      |                      |
| 1 Rice, wheat, corn, and other                                               | 166.17 (77.26)                         | 166.56 (75.39)            | 169.03 (88.47)       | 163.06 (69.24)       |
| <b>Tubers and starchy vegetables, n(%)</b>                                   |                                        |                           |                      |                      |
| 2 Potatoes                                                                   | 59.42 (28.78)                          | 67.66 (36.77)             | 58.63 (27.40)        | 54.05 (20.69)        |
| <b>Vegetables, n(%)</b>                                                      |                                        |                           |                      |                      |
| 3 All vegetables                                                             | 1296.57<br>(7202.97)                   | 986.23<br>(6201.78)       | 1231.53<br>(6920.22) | 1671.57<br>(8296.52) |
| <b>Fruits, n(%)</b>                                                          |                                        |                           |                      |                      |
| 4 All fruits                                                                 | 331.26 (209.59)                        | 302.31 (208.89)           | 335.78 (208.63)      | 361.35 (206.66)      |
| <b>Dairy foods, n(%)</b>                                                     |                                        |                           |                      |                      |
| 5 Whole milk or derivative equivalents                                       | 188.95 (156.11)                        | 192.19 (179.29)           | 186.86 (150.97)      | 187.27 (133.17)      |
| <b>Protein sources, n(%)</b>                                                 |                                        |                           |                      |                      |
| 6 Beef, lamb, pork                                                           | 98.89 (62.51)                          | 107.23 (67.93)            | 96.52 (58.10)        | 85.26 (52.58)        |
| 7 Chicken, other poultry                                                     | 81.42 (33.83)                          | 87.25 (36.46)             | 80.60 (31.76)        | 73.35 (29.44)        |
| 8 Eggs                                                                       | 77.01 (34.40)                          | 79.02 (35.46)             | 73.44 (32.35)        | 70.49 (29.42)        |
| 9 Fish                                                                       | 111.28 (53.75)                         | 128.74 (70.33)            | 111.18 (53.47)       | 102.04 (39.55)       |
| <b>Legumes</b>                                                               |                                        |                           |                      |                      |
| 10 Dry beans, lentils, peas                                                  | 140.57 (117.47)                        | 185.27 (142.18)           | 146.71 (119.87)      | 129.32 (107.64)      |
| 11 Soy foods                                                                 | 98.72 (41.77)                          | 103.13 (41.50)            | 104.25 (48.36)       | 92.82 (37.30)        |
| 12 Peanuts or tree nuts                                                      | 28.48 (18.55)                          | 23.08 (15.10)             | 26.45 (17.51)        | 31.61 (19.63)        |
| <b>Added fats, n(%)</b>                                                      |                                        |                           |                      |                      |
| 13 Palm oil, unsaturated oils, dairy fats (included in milk), lard or tallow | 0.55 (0.34)                            | 0.46 (0.28)               | 0.54 (0.32)          | 0.70 (0.40)          |
| <b>Added sugars, n(%)</b>                                                    |                                        |                           |                      |                      |
| 14 All sweeteners                                                            | 118.39 (50.65)                         | 109.41 (50.84)            | 122.50 (50.18)       | 129.17 (48.14)       |

**Supplementary Table 5: HRs (95% CIs) of T2D incident according to EAT-LDP score group (n=59,351).**

|                                 | <b>Model 1<sup>a</sup></b> | <b>Model 2<sup>b</sup></b> | <b>Model 3<sup>c</sup></b> | <b>Model 4<sup>d</sup></b> |
|---------------------------------|----------------------------|----------------------------|----------------------------|----------------------------|
| Tertiles of EAT-LDP score       |                            |                            |                            |                            |
| T1                              | 1.00 (reference)           | 1.00 (reference)           | 1.00 (reference)           | 1.00 (reference)           |
| T2                              | 0.76 (0.68, 0.85)          | 0.80 (0.71, 0.89)          | 0.81 (0.71, 0.91)          | 0.86 (0.76, 0.97)          |
| T3                              | 0.72 (0.65, 0.80)          | 0.77 (0.69, 0.86)          | 0.80 (0.71, 0.91)          | 0.95 (0.84, 1.07)          |
| <i>P</i> for trend              | <0.0001                    | <0.0001                    | <0.0001                    | 0.219                      |
| 1-point increment in diet score | 0.90 (0.88, 0.93)          | 0.92 (0.89, 0.95)          | 0.94 (0.91, 0.97)          | 0.98 (0.95, 1.02)          |

Participants were excluded in this sub-analysis if the follow up was less than 3 years.

a Crude model.

b Adjusted for age, sex, Townsend deprivation index, qualifications, and ethnicity.

c Adjusted for age, sex, Townsend deprivation index, qualifications, ethnicity, smoking, drinking, physical activity, energy.

d Adjusted for age, sex, Townsend deprivation index, qualifications, ethnicity, smoking, drinking, physical, energy, BMI and waist circumference.

**Supplementary Table 6: HRs (95% CIs) of T2D incident according to EAT-LDP score group after multiple imputation\*.**

|                                 | <b>Model 1<sup>a</sup></b> | <b>Model 2<sup>b</sup></b> | <b>Model 3<sup>c</sup></b> | <b>Model 4<sup>d</sup></b> |
|---------------------------------|----------------------------|----------------------------|----------------------------|----------------------------|
| Tertiles of EAT-LDP score       |                            |                            |                            |                            |
| T1                              | 1.00 (reference)           | 1.00 (reference)           | 1.00 (reference)           | 1.00 (reference)           |
| T2                              | 0.73 (0.70, 0.78)          | 0.80(0.75, 0.85)           | 0.80 (0.74, 0.86)          | 0.86 (0.80, 0.93)          |
| T3                              | 0.66 (0.63, 0.70)          | 0.74 (0.70, 0.79)          | 0.75 (0.70, 0.81)          | 0.87 (0.80, 0.94)          |
| <i>P</i> for trend              | <0.0001                    | <0.0001                    | <0.0001                    | <0.0001                    |
| 1-point increment in diet score | 0.87 (0.85, 0.88)          | 0.90 (0.88, 0.91)          | 0.90 (0.89, 0.92)          | 0.46 (0.92, 0.96)          |

\*: Multiple imputation of missing covariates.

a Crude model.

b Adjusted for age, sex, Townsend deprivation index, qualifications, and ethnicity.

c Adjusted for age, sex, Townsend deprivation index, qualifications, ethnicity, smoking, drinking, physical activity, energy.

d Adjusted for age, sex, Townsend deprivation index, qualifications, ethnicity, smoking, drinking, physical activity, energy, BMI and waist circumference.

**Supplementary Table 7: Association between EAT-LDP score and incidence of T2D stratified by different covariates.**

|                                 | Tertiles of EAT-LDP score |                   |                   | <i>P</i> for trend | 1 point increment<br>in EAT-LDP score | <i>P</i> for interaction |
|---------------------------------|---------------------------|-------------------|-------------------|--------------------|---------------------------------------|--------------------------|
|                                 | T1                        | T2                | T3                |                    |                                       |                          |
| <b>Age</b>                      |                           |                   |                   |                    |                                       | 0.863                    |
| <60                             | 1.00 (reference)          | 0.84 (0.71, 0.99) | 0.86 (0.73, 1.02) | 0.047              | 0.92 (0.85, 1.01)                     |                          |
| ≥60                             | 1.00 (reference)          | 0.88 (0.76, 1.02) | 0.81 (0.70, 0.94) | 0.004              | 0.94 (0.90, 0.98)                     |                          |
| <b>Sex</b>                      |                           |                   |                   |                    |                                       | 0.268                    |
| Female                          | 1.00 (reference)          | 0.84 (0.71, 1.00) | 0.72 (0.61, 0.86) | <0.0001            | 0.91 (0.87, 0.96)                     |                          |
| Male                            | 1.00 (reference)          | 0.85 (0.73, 0.98) | 0.88 (0.76, 1.02) | 0.046              | 0.96 (0.92, 1.00)                     |                          |
| <b>Ethnicity</b>                |                           |                   |                   |                    |                                       | 0.637                    |
| White                           | 1.00 (reference)          | 0.86 (0.76, 0.97) | 0.80 (0.71, 0.90) | <0.0001            | 0.94 (0.91, 0.97)                     |                          |
| Non-White                       | 1.00 (reference)          | 0.76 (0.55, 1.05) | 0.87 (0.64, 1.19) | 0.246              | 0.96 (0.89, 1.05)                     |                          |
| <b>Deprivation</b>              |                           |                   |                   |                    |                                       | 0.653                    |
| <median                         | 1.00 (reference)          | 0.88 (0.75, 1.02) | 0.79 (0.68, 0.92) | 0.002              | 0.94 (0.90, 0.98)                     |                          |
| ≥median                         | 1.00 (reference)          | 0.81 (0.69, 0.95) | 0.82 (0.70, 0.96) | 0.005              | 0.94 (0.90, 0.98)                     |                          |
| <b>Education attainment</b>     |                           |                   |                   |                    |                                       | 0.748                    |
| College or university<br>degree | 1.00 (reference)          | 0.92 (0.75, 1.11) | 0.83 (0.69, 1.00) | 0.055              | 0.93 (0.88, 0.98)                     |                          |
| Professional qualifications     | 1.00 (reference)          | 0.69 (0.43, 1.11) | 0.82 (0.52, 1.28) | 0.310              | 0.97 (0.85, 1.11)                     |                          |
| Others                          | 1.00 (reference)          | 0.84 (0.73, 0.97) | 0.79 (0.69, 0.91) | 0.001              | 0.94 (0.91, 0.98)                     |                          |
| <b>Smoking status</b>           |                           |                   |                   |                    |                                       | 0.673                    |
| Never                           | 1.00 (reference)          | 0.82 (0.69, 0.96) | 0.81 (0.69, 0.95) | 0.006              | 0.94 (0.90, 0.98)                     |                          |
| Previous                        | 1.00 (reference)          | 0.90 (0.76, 1.06) | 0.77 (0.65, 0.92) | 0.003              | 0.92 (0.88, 0.97)                     |                          |
| Current                         | 1.00 (reference)          | 0.85 (0.58, 1.23) | 0.97 (0.66, 1.44) | 0.706              | 1.01 (0.92, 1.12)                     |                          |
| <b>Drinking status</b>          |                           |                   |                   |                    |                                       | 0.418                    |
| Never                           | 1.00 (reference)          | 0.93 (0.61, 1.41) | 0.54 (0.32, 0.89) | 0.021              | 0.85(0.75, 0.96)                      |                          |
| Previous                        | 1.00 (reference)          | 0.76 (0.46, 1.24) | 1.05 (0.68, 1.62) | 0.997              | 1.02 (0.90, 1.15)                     |                          |
| Current                         | 1.00 (reference)          | 0.84 (0.75, 0.95) | 0.81 (0.72, 0.91) | <0.0001            | 0.94 (0.91, 0.97)                     |                          |



**Supplementary Figure 1: Distribution of the EAT-LDP score in the 59,849 participants.**

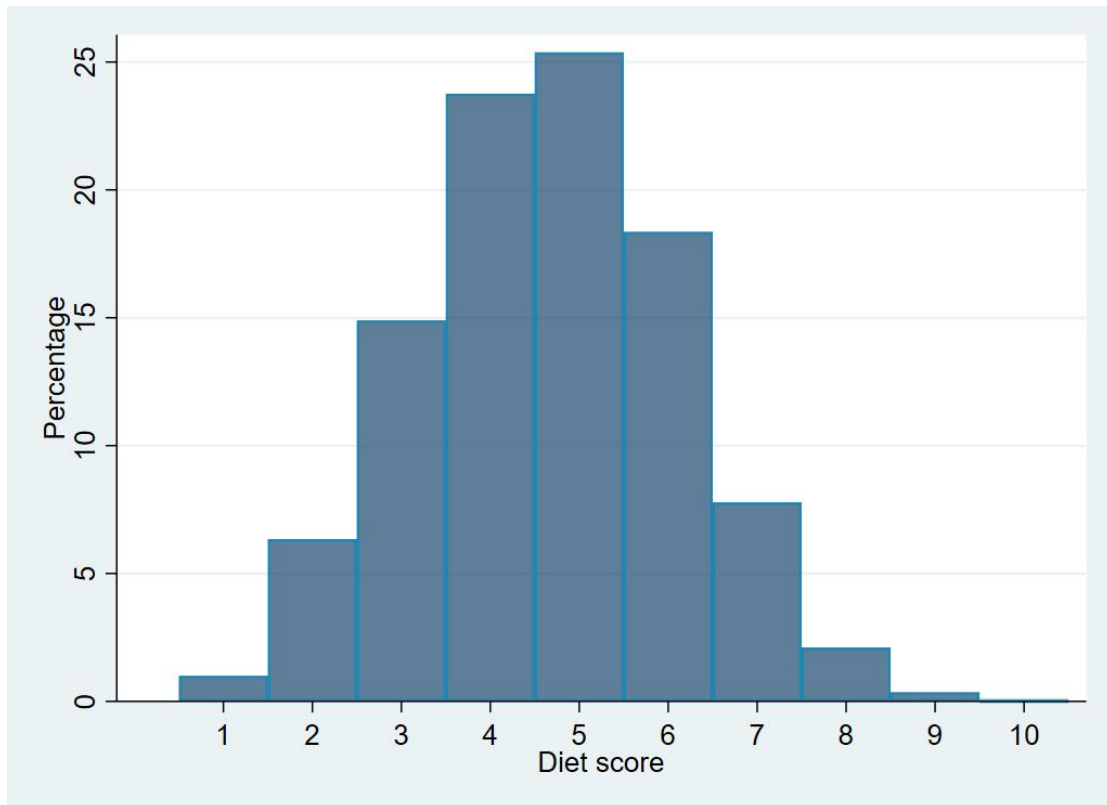

**Supplementary Figure 2: Association between adherence of specific food recommendations and incident T2D.**

| Component                      | Recommended amount based on the EAT-LDP | NO. of participants meeting the recommendations |  | HR (95% CI)*      | P value |
|--------------------------------|-----------------------------------------|-------------------------------------------------|--|-------------------|---------|
| 1 Rice, wheat, corn, and other | ≤ 464g/day                              | 45100                                           |  | 1.23 (0.46, 3.30) | 0.675   |
| 2 Potatoes and cassava         | ≤100g/day                               | 27208                                           |  | 0.83 (0.75, 0.91) | <0.0001 |
| 3 All vegetables               | ≥200g/day                               | 34637                                           |  | 0.88 (0.81, 0.96) | <0.0001 |
| 4 All fruits                   | ≥100g/day                               | 45274                                           |  | 0.87 (0.79, 0.95) | 0.002   |
| 5 Dairy foods                  | ≤500g/day                               | 36943                                           |  | 0.78 (0.62, 0.97) | 0.027   |
| 6 Beef, lamb, pork             | ≤28g/day                                | 1010                                            |  | 0.60 (0.40, 0.90) | 0.013   |
| 7 Chicken, other poultry       | ≤58g/day                                | 2694                                            |  | 1.11 (0.92, 1.36) | 0.27    |
| 8 Eggs                         | ≤25g/day                                | 47632                                           |  | 0.84 (0.75, 0.93) | 0.001   |
| 9 Fish                         | ≤100g/day                               | 14574                                           |  | 0.92 (0.84, 1.02) | 0.109   |
| 10 Dry beans, lentils, peas    | ≤100g/day                               | 7798                                            |  | 0.98 (0.86, 1.12) | 0.790   |
| 11 Soy foods                   | ≤50g/day                                | 59511                                           |  | 1.03 (0.27, 3.85) | 0.971   |
| 12 Peanuts or tree nuts        | ≥25g/day                                | 3940                                            |  | 0.94 (0.79, 1.12) | 0.492   |
| 13 Added fats                  | ratio: 0.8**                            | 10622                                           |  | 0.94 (0.85, 1.04) | 0.239   |
| 14 Added sugars                | ≤50g/day                                | 914                                             |  | 1.85 (1.45, 2.37) | <0.0001 |

\* HRs for adherence vs. non-adherence participants, and were adjusted for age, sex, Townsend deprivation index, qualifications, ethnicity, smoking, drinking, physical activity, and energy.

\*\* Ratio of 0.8 for unsaturated: saturated fat intake.
